# Supplementary material for: Evaluating the techno-economic potential of defossilized air-to-syngas pathways
Source: Royal Society of Chemistry journal article supplement (doi:10.1039/d3ee02589f), 2023-01-01
Supplement: d3ee02589f1.pdf [file d3ee02589f1.pdf]

# Electronic Supplementary Information:

## Evaluating the techno-economic potential of defossilized air-to-syngas pathways

Hussain M. Almajed<sup>a,b</sup>, Omar J. Guerra<sup>c</sup>, Wilson A. Smith<sup>a,b,c,d</sup>, Bri-Mathias Hodge<sup>\*b,c,e,f</sup> and Ana Somoza-Tornos<sup>\*b,d</sup>

---

<sup>a</sup> Department of Chemical and Biological Engineering, University of Colorado Boulder, Boulder, CO 80309, USA.

<sup>b</sup> Renewable and Sustainable Energy Institute, University of Colorado Boulder, Boulder, CO 80309, USA.

<sup>c</sup> National Renewable Energy Laboratory, Golden, CO, 80401, USA.

<sup>d</sup> Delft University of Technology, Department of Chemical Engineering, Van der Maasweg 9, 2629 HZ Delft, The Netherlands.

<sup>e</sup> Department of Electrical, Computer, and Energy Engineering, University of Colorado Boulder, Boulder, CO 80309, USA.

<sup>f</sup> Department of Applied Mathematics, University of Colorado Boulder, Boulder, CO 80309, USA.

## Table of Contents

|                                                                         |           |
|-------------------------------------------------------------------------|-----------|
| <b>S.1. Process modeling.....</b>                                       | <b>3</b>  |
| S.1.1. Direct air CO <sub>2</sub> capture (DACC).....                   | 3         |
| S.1.2. Reverse water gas shift (RWGS).....                              | 7         |
| S.1.3. Electrolysis model.....                                          | 8         |
| S.1.4. Steam methane reforming (SMR).....                               | 10        |
| <b>S.2. Techno-economic assessment (TEA) .....</b>                      | <b>10</b> |
| S.2.1. Capital costs.....                                               | 11        |
| S.2.2. Operational costs.....                                           | 13        |
| <b>S.3. Mass flow rates and fractions of major DACC equipment .....</b> | <b>14</b> |
| <b>S.4. Technical metrics calculations .....</b>                        | <b>27</b> |
| S.4.1. Carbon efficiency .....                                          | 27        |
| S.4.2. Energy consumption .....                                         | 27        |
| <b>S.5. Supplementary figures.....</b>                                  | <b>27</b> |
| S.5.1. Comparison of our and Keith et al.'s modeling results .....      | 27        |
| S.5.2. Additional future scenarios.....                                 | 28        |
| S.5.3. Aspen Plus process flow diagram of the DACC plant.....           | 31        |
| <b>References .....</b>                                                 | <b>32</b> |

## S.1. Process modeling

### S.1.1. Direct air CO<sub>2</sub> capture (DACC)

We developed our DACC plant model in Aspen Plus using modeling and flow rate information from several of Carbon Engineering's publications<sup>1-3</sup> as well as from other researchers<sup>4,5</sup> who attempted to model the hydroxide-based DACC plant. Our model leverages the Electrolyte Non-Random Two-Liquid (ELECNRTL) thermodynamic model to account for like-ion repulsion and electroneutrality.<sup>6</sup> Following Keith et al.'s method,<sup>1</sup> we added the ASPENPCD, AQUEOUS, INORGANIC, PURE26, and SOLIDS databanks to the ELECNRTL default databanks.

To begin, we modeled the air contactor using a built-in rate-based RADFRAC model, operating at 25°C and 1 atm. The modeling specifications, flow rates, and fractions are shown in Tables S.1, S.2, and S.3, respectively. We chose a packing height and diameter of 8.3 m and 4.0 m, respectively, similar to the optimized air travel distance (7 m) and diameter (5 m) of Carbon Engineering's air contactor design.<sup>1</sup> The difference in height and diameter most likely comes from the different flow configurations; our RADFRAC unit assumes a counter-flow configuration whereas the CE air contactor operates in a cross-flow mode. We additionally accounted for pressure drop through the contactor by adding a pressure drop of 127.515 Pa, corresponding to the calculated pressure drop using data from Carbon Engineering.<sup>1,2</sup> Moreover, we attached two kinetic and two equilibrium reactions (Eqs. S.1–S.4) to the air contactor model along with their pre-exponential factors and activation energies (see Table S.4 for kinetic data and Table S.5 for equilibrium data) to simulate the CO<sub>2</sub> capture process using hydroxides. We chose a standard MELLAPAK Sulzer 250X column packing and changed its specific surface area (SSA) to be equivalent to that of Brentwood XF12560 packing (i.e., 210 m<sup>2</sup>/m<sup>3</sup>)(1). The choice of packing was motivated by Heidel et al.'s<sup>3</sup> study that demonstrates the similar capture behavior of the two mentioned packings. Our modular air contactor model was designed to capture 633 t-CO<sub>2</sub>/yr, consistent with the estimate given by Keith and colleagues (i.e. 160 units can capture about 100 kt-CO<sub>2</sub>/yr).<sup>1</sup> Consequently, we were able to use it for any capture amount needed.

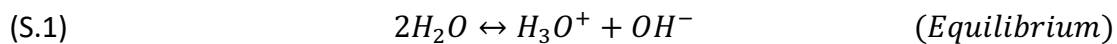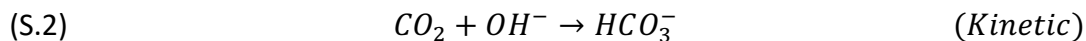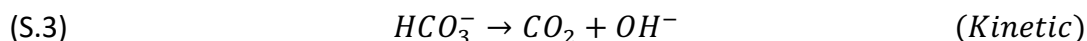

(S.4)

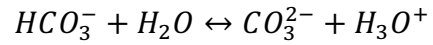*(Equilibrium)***Table S.1.** Modeling specifications.

| <b>RADFRAC Specifications</b>          |              |
|----------------------------------------|--------------|
| Number of Stages                       | 16           |
| Calculation Type                       | Rate-Based   |
| Condenser?                             | No           |
| Reboiler?                              | No           |
| Valid Phases                           | Vapor-Liquid |
| Convergence Type                       | Standard     |
| Pressure Drop                          | 127.515 Pa   |
| Liquid and Gas Feed Temperature        | 21 °C        |
| Operating Liquid and Gas Feed Pressure | 1 atm        |
| Liquid Feed Stage                      | 16, On-Stage |
| Air Feed Stage                         | 1, On-Stage  |
| Stage 1 Pressure                       | 1 atm        |
| <b>Column Specifications</b>           |              |
| Starting Stage                         | 1            |
| Ending Stage                           | 16           |
| Mode                                   | Rating       |
| Internal Type                          | Packed       |
| Packing Type                           | MELLAPAK     |

|                                |                         |
|--------------------------------|-------------------------|
| Vendor                         | Sulzer                  |
| Material                       | Standard                |
| Dimensions                     | 250X                    |
| Section Packed Height          | 7 m                     |
| Diameter                       | 5.642 m                 |
| <b>Design Specification</b>    |                         |
| Mass Recovery Ratio            | 0.255                   |
| <b>Vary Parameter</b>          |                         |
| Air Feed Rate                  | 21,000 – 25,000 kmol/hr |
| <b>Reaction Specifications</b> |                         |
| Reactions Included             | Equations (S.1) – (S.4) |
| Starting Stage                 | 1                       |
| Ending Stage                   | 16                      |
| Residence Time                 | 0.001 sec               |

**Table S.2.** Mass and mole flow rates.

| Stream         | Mass Flow Rate (kg/hr) | Molar Flow Rate (kmol/hr) |
|----------------|------------------------|---------------------------|
| Air Inlet      | 674,000                | 23,496.2                  |
| Sorbent Inlet  | 12,400                 | 650.745                   |
| Liquid Product | 674,953                | 23,559                    |
| Depleted Air   | 11,447                 | 581.109                   |

**Table S.3.** Mass and mole fractions.

| Component       | Air Inlet | Sorbent Inlet | Liquid Product | Depleted Air |
|-----------------|-----------|---------------|----------------|--------------|
| CO <sub>2</sub> | 0.0006    | 1.165E-14     | 0.000152       | 2.487E-08    |

|                                |        |           |        |           |
|--------------------------------|--------|-----------|--------|-----------|
| H <sub>2</sub> O               | 0.0098 | 0.8872    | 0.0116 | 0.8602    |
| K <sup>+</sup>                 | 0      | 0.0712    | 0      | 0.0771    |
| CO <sub>3</sub> <sup>2-</sup>  | 0      | 0.0246    | 0      | 0.0557    |
| O <sub>2</sub>                 | 0.23   | 0         | 0.2297 | 6.134E-06 |
| N <sub>2</sub>                 | 0.7596 | 0         | 0.7585 | 1.018E-05 |
| HCO <sub>3</sub> <sup>-</sup>  | 0      | 2.653E-06 | 0      | 0.00694   |
| H <sub>3</sub> O <sup>+</sup>  | 0      | 1.588E-16 | 0      | 5.293E-14 |
| OH <sup>-</sup>                | 0      | 0.0170    | 0      | 2.361E-05 |
| KOH                            | 0      | 0         | 0      | 0         |
| K <sub>2</sub> CO <sub>3</sub> | 0      | 0         | 0      | 0         |
| KHCO <sub>3</sub>              | 0      | 0         | 0      | 0         |

**Table S.4.** Kinetic data.

| Reaction | k                    | n | E <sub>activation</sub> (kJ/mol) | Notes              | Reference         |
|----------|----------------------|---|----------------------------------|--------------------|-------------------|
| (S.2)    | $4.20 \cdot 10^{13}$ | 0 | 55.385                           | T-Range: 0 – 40 °C | Pinsent et al.(7) |
| (S.3)    | $2.38 \cdot 10^{17}$ | 0 | 123.22                           |                    |                   |

**Table S.5.** Equilibrium data.

| Reaction | A       | B        | C        | D | Notes               | Reference         |
|----------|---------|----------|----------|---|---------------------|-------------------|
| (S.1)    | 140.932 | -13445.9 | -22.4773 | 0 | T-Range: 0 – 225 °C | Edwards et al.(8) |
| (S.4)    | 220.067 | -12431.7 | -35.4819 | 0 |                     |                   |

We also modeled the pellet reactor, slaker, and calciner in Aspen Plus to create an integrated DACC process. We used built-in stoichiometric reactors (i.e., RStoic) that assume the absence of kinetic limitations and require reaction information along with a fractional conversion percentage for each. We defined Eqs. 2 and 3, in the main text, to be the only active reactions inside the pellet reactor and slaker, respectively, with fractional conversions of 90% of Ca(OH)<sub>2</sub> and 85% of

CaO, as provided by Keith and colleagues.<sup>1</sup> Finally, we considered the calcination of 98% of CaCO<sub>3</sub> and the combustion of 100% of CH<sub>4</sub> in the calciner unit.

In addition to the major DACC equipment, the present model considers quicklime mixing, power generation using a Heat Recovery Steam Generation (HRSG) setup, and some downstream processing. The quicklime mixing is modeled using a stoichiometric reactor (RStoic) to allow for the remaining CaO to convert fully into Ca(OH)<sub>2</sub>. Power generation was modeled using a Gibbs reactor (RGibbs) to simulate the combustion of methane before supplying the heat into an HRSG unit, which was modeled using a heat exchanger (MHeatX). Finally, downstream processing is dependent on the conditions required for storage or utilization. To reproduce Keith et al.'s results,<sup>1</sup> we consider downstream processing to include dehydration as well as multi-stage compression to 150 bar with in-between stage coolers. However, for integration with RWGS or CO<sub>2</sub>ER, we consider downstream processing to include a dehydration step followed by a cooling step. Further information about the model can be found in the SI.

### S.1.2. Reverse water gas shift (RWGS)

The referenced RWGS model was built in Aspen Plus by Rezaei and Dzuryk.<sup>9</sup> They were able to feed in a mixture of CO<sub>2</sub> and H<sub>2</sub> at an H<sub>2</sub>:CO<sub>2</sub> molar ratio of 2.85 to a fired heater (RWGS reactor) at 945 °C and 4.1 bar, achieving a CO<sub>2</sub> molar conversion of about 77%. The gaseous outlet is then fed to an amine-based CO<sub>2</sub> absorption process, in which CO<sub>2</sub> is captured using a monoethanolamine (MEA) liquid solvent. The products are finally compressed, dehydrated, and heated to have a final temperature and pressure of 200 °C and 30 bar, respectively. The production rate was calculated to be 22,575.6 kmol-syngas/hr (equivalent to 2.12 Mt-syngas/yr for 100% plant utilization) and the molar ratio of syngas was set to 2. The reported equipment duties, annual CAPEX, and steam utility costs were referenced in this study to estimate the 2021-extrapolated annual CAPEX, OPEX, and total syngas cost of the DACC-PEMWE-RWGS pathway. It is worth noting that no new modeling results were obtained for the RWGS because it was used as developed by the authors.

Equations S.5 – S.10 show the Sabatier and carbon formation side reactions:

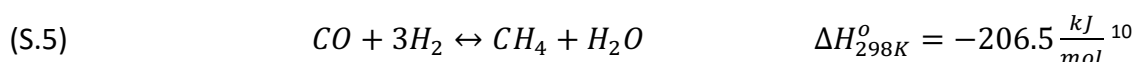

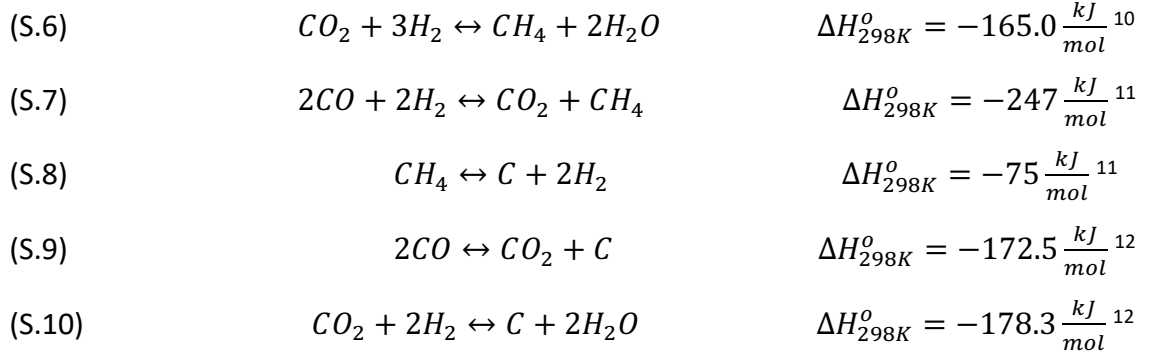

### S.1.3. Electrolysis model

Our electrolysis model rigorously performs mass and energy balances of a referenced system to estimate the production rate of our product and the total current needed for electrolysis (Eq. S.11). The electrolyzer area is taken from a reference study and scaled up to produce the needed production rate. This information is then used to estimate the current density (Eq. S.12), relating the total production rate to the current density of our system. Following that, we implement the famous Butler-Volmer equation (Eq. S.13) to correlate the current density to the cell voltage, allowing for more accurate estimates of the total product cost in the sensitivity analysis. However, before using this equation, we need empirical values of the exchange current density ( $j_{ex,0}$ ), the charge transfer coefficient ( $\alpha$ ), and the activation overpotential ( $\eta_{ac}$ ). The first two can be taken from an experimental reference study. The activation overpotential can be estimated from the total cell voltage ( $V_{cell}$ ), the thermoneutral cell voltage ( $V_{tn}$ ), and the ohmic overpotential of membrane ( $\eta_{ohmic,memb}$ ), electrolyte ( $\eta_{ohmic,electrolyte}$ ), and bubbles ( $\eta_{ohmic,bubble}$ ). Equations S.14 and S.15 can be used to calculate the thermoneutral cell voltage and estimate the ohmic overpotentials, respectively.  $F$  is Faraday's constant, which is equal to  $96,485 \text{ A} \cdot \frac{mol}{s}$ ,  $X_i$  is the thickness of element  $i$  in meters, and  $\kappa_i$  is the electrical conductivity of element  $i$  in S/m.  $i$  refers to membrane or electrolyte in our case. Equation S.16 can be used to estimate  $\eta_{ac}$ , assuming some value of  $\eta_{ohmic,bubble}$ . For further information of how we estimate the bubble overpotential, please refer to the next paragraph. From here, we are able to estimate the electrolyzer power consumption (Eq. S.17) and the total electricity consumption of the pressure swing adsorption (PSA) separation (Eq. S.18).  $E_{PSA,ref}$  is the reference electricity consumption of



PSA in kWh/m<sup>3</sup>,  $\dot{V}_{cathode}$  is the volumetric flow rate of the gaseous cathodic products in m<sup>3</sup>/yr, and  $C_{el}$  is the electricity price in \$/kWh. In addition to all of these features, our model is able to consider CO<sub>2</sub> losses due to (bi)carbonates that can cross over to the anode side as carbonates. Those are ideally measured experimentally and inputted into the model as loss percentages.

$$(S.11) \quad I_{tot} = \left( \frac{\dot{m}_{CO}}{MW_{CO}} \cdot z_{e^-,CO} + \frac{\dot{m}_{H_2}}{MW_{H_2}} \cdot z_{e^-,H_2} \right) \cdot \frac{F}{3600}$$

$$(S.12) \quad j_{tot} = \frac{I_{tot}}{A_{electrode}}$$

$$(S.13) \quad j_{tot} = j_{ex,0} \left[ \exp\left(\frac{\alpha \cdot z \cdot F \cdot \eta_{ac}}{RT}\right) - \exp\left(\frac{-(1-\alpha) \cdot z \cdot F \cdot \eta_{ac}}{RT}\right) \right]$$

$$(S.14) \quad V_{tn} = \frac{\Delta H_{rxn}}{nF}$$

$$(S.15) \quad \eta_{ohmic,i} = X_i \frac{j_{tot}}{\kappa_i}$$

$$(S.16) \quad \eta_{ac} = V_{cell} - V_{tn} - \eta_{ohmic,i} - \eta_{ohmic,bubble}$$

$$(S.17) \quad P = I_{tot} \cdot V_{cell}$$

$$(S.18) \quad E_{PSA} = E_{PSA,ref} \cdot C_{el} \cdot \dot{V}_{cathode}$$

As mentioned above, after estimating the ohmic overpotential of the membrane and electrolyte, we use them in Eq. S.16 to estimate the activation overpotential. However, the total current density,  $j_{tot}$ , would result in a different value than the expected one, which is 612 mA/cm<sup>2</sup> in our case. Thus, we use  $\eta_{ohmic,bubble}$  as a tuning knob to allow for  $j_{tot}$  to be equal to our expected current density, 612 mA/cm<sup>2</sup>. Thus, we find the ohmic overpotential of the bubble to be approximately 0.1014 V. To complete the calculations, we use the following values to estimate the total current density using Equations S.13, S.14, S.15, and S.16:

- $V_{cell} = 3.3 \text{ V}^{13}$
- $V_{tn} = 1.47 \text{ V}$
- $X_{electrolyte} = 1 \text{ mm}^{13}$
- $\kappa_{electrolyte} = 7.2 \text{ S/m}$
- $X_{membrane} = 25 \text{ } \mu\text{m}^{13}$
- $\kappa_{membrane} = 7.8 \text{ S/m}^{14}$
- $j_{tot} = 612 \text{ mA/cm}^2$  (**only used in Eq. S.15, and calculated using equation S.13**)
- $\alpha = 0.201^{15}$

- $z = 2$  (mol- $e^-$ /mol-CO)
- $R = 8.314$  J/(K•mol-CO)
- $T = 298.15$  K
- $j_{ex,0} = 0.000842$  mA/cm<sup>2</sup> <sup>15</sup>
- $\eta_{ohmic,bubble} = 0.1014$  V

#### S.1.4. Steam methane reforming (SMR)

The referenced SMR process model assumes pure CH<sub>4</sub> and H<sub>2</sub>O inlets of 3,160 kmol-CH<sub>4</sub>/hr and 9,480 kmol-H<sub>2</sub>O/hr, respectively.<sup>9</sup> The model includes a fired heater as well as an absorber and a regenerator to remove CO<sub>2</sub> from the H<sub>2</sub> product stream. The captured CO<sub>2</sub> can either be recycled to the RWGS reactor (when integrated with RWGS) or emitted to the atmosphere. We consider both scenarios in the main text.

At the modeled scale, the SMR plant is able to produce 19,665 kg-H<sub>2</sub>/hr whereas the RWGS reactor requires 45,397 kg-H<sub>2</sub>/hr. Thus, we linearly scaled up the SMR model by a factor of 2.3 to reach the needed scale for the purposes of our work. Additionally, it is worth noting that the outlet temperature and pressure of H<sub>2</sub> in the modeled SMR process are not identical to the inlet conditions of H<sub>2</sub> in the RWGS plant. However, this fact does not change the conclusions of our presented work as we include the carbon efficiency, energy consumption and cost, and marginal energy-associated CO<sub>2</sub> emissions in our assessment of DACC-SMR-RWGS and exclude the economic metrics. In other words, adding a turbine and a cooler would only increase the energy consumption and cost of DACC-SMR-RWGS, which would not change the outcome of our work.

## S.2. Techno-economic assessment (TEA)

The TEA presented here generally follows the method given by Towler and Sinnott.<sup>16</sup> The total product cost per mass ( $TPC_{product}$ ) is simply the summation of the annual capital and operational costs divided by the mass flow rate of the product in kg/yr, Eq. S.19. The following subsections summarize the capital and operational cost calculations and assumptions.

$$(S.19) \quad TPC_{product} = \frac{CAPEX_{annual} + OPEX_{annual}}{\dot{m}_{product}}$$

### S.2.1. Capital costs

The purchased equipment cost (PEC) can be estimated using two methods: the bare-module and the Lang-factor methods. The former references an older cost estimate ( $PEC_{old}$ ) of the same equipment, a sizing parameter ( $S_{old}$ ), and a scaling factor ( $n$ ) and requires a new sizing parameter ( $S_{new}$ ) to be known, as shown in Eq. S.20. The latter method uses two constants ( $a$  and  $b$ ), a new sizing parameter ( $S_{new}$ ), and a scaling factor ( $n$ ), Eq. S.21. Both methods are capable of estimating the PEC of an equipment, but the method of choice will depend on the cost information availability and source. For H<sub>2</sub>O and CO<sub>2</sub> electrolyzers, the rigorous estimate of a future centralized PEM water electrolyzer given by the H<sub>2</sub>A production model (\$233/kWh)<sup>17</sup> was used because it is considered the state-of-the-art estimate today.<sup>18,19</sup> Although several researchers<sup>20–22</sup> have attempted to estimate the CO<sub>2</sub> electrolyzer CAPEX per m<sup>2</sup> using different methods, their very wide cost range of \$960-12,000/m<sup>2</sup> indicates the existence of high uncertainty. We acknowledge that this area needs further studies and thus stick with the future estimate of the state-of-the-art H<sub>2</sub>O electrolyzer CAPEX for both H<sub>2</sub>O and CO<sub>2</sub> electrolyzers here. As a comparison, however, the capital costs of H<sub>2</sub>O electrolyzers and CO<sub>2</sub> electrolyzers are equivalent to \$8,877/m<sup>2</sup> and \$4,713/m<sup>2</sup>, respectively, which fall within the wide range mentioned above.

$$(S.20) \quad PEC = PEC_{old} \left( \frac{S_{new}}{S_{old}} \right)^n$$

$$(S.21) \quad PEC = a + bS_{new}^n$$

The installed equipment cost (IEC) was calculated by multiplying an appropriate installation factor ( $f_{installation}$ ) by the respective PEC using Eq. S.22. Table S.6 summarizes a full list of installation factors used in this study and for details on which PEC equation is used for which equipment. Further, extrapolation to 2021 costs was performed using the chemical engineering plant cost index (CEPCI), as shown by Eq. S.23, in which  $IEC_{old}$ ,  $IEC_{2021}$ ,  $CEPCI_{old}$ , and  $CEPCI_{2021}$  are the IEC in the older year, IEC in 2021, CEPCI of the older year, and CEPCI of 2021, respectively. We use a value of 708 for  $CEPCI_{2021}$ .

$$(S.22) \quad IEC_{old} = f_{installation} \cdot PEC$$

$$(S.23) \quad IEC_{2021} = IEC_{old} \cdot \left( \frac{CEPCI_{2021}}{CEPCI_{old}} \right)$$

**Table S.6.** Installation factors used in the present study.

| Equipment                                     | Installation Factor |
|-----------------------------------------------|---------------------|
| Centrifugal fans                              | 1.4                 |
| PVC packing                                   | 3.2                 |
| Pump                                          | 4                   |
| Crystallizer (pellet reactor)                 | 2.2                 |
| Furnace (calciner)                            | 2.5                 |
| Fluidized-bed dryer (slaker)                  | 2.2                 |
| H <sub>2</sub> O/CO <sub>2</sub> electrolyzer | 1.2                 |
| Catalyst/membrane                             | 1.2                 |
| Pressure swing adsorber                       | 2.5                 |

The inside battery limit (ISBL) cost is simply the summation of all 2021 IECs, Eq. S.24. From the ISBL, an estimate of the OSBL, engineering, and contingency costs can be generated. The OSBL was assumed to be 40% of the ISBL, consistent with typical initial estimates of new petrochemical plants.<sup>16</sup> The engineering and contingency costs were assumed to be 10% and 30% of the summation of ISBL and OSBL, respectively.<sup>16</sup> Finally, the fixed capital investment (FCI) or the capital expenditures (CAPEX) is the summation of ISBL, OSBL, engineering, and contingency costs, as shown by Eq. S.25. Adding 15% of the summation of ISBL and OSBL as the working capital (WC) would give the total FCI (TFCI). To annualize the TFCI or the FCI, a multiplication factor called the capital recovery factor (CRF) is used, Eq. S.26 and S.27. In Eq. S.26,  $i$  is the interest rate and  $t$  is the plant lifetime.

$$(S.24) \quad ISBL = \sum IEC_i$$

$$(S.25) \quad FCI = CAPEX = ISBL + OSBL + Engineering + Contingency$$

$$(S.26) \quad CRF = \frac{i(1+i)^t}{[(1+i)^t - 1]}$$

$$(S.27) \quad Annual \ CAPEX = CAPEX \cdot CRF$$

In the present work, the interest rate is assumed to be 7% for DACC and RWGS, and 10.1% for PEMWE and CO<sub>2</sub>ER. The lifetime is assumed to be 25 years for DACC and RWGS, and 11 years for PEMWE and CO<sub>2</sub>ER. The higher interest rates and lower lifetimes for electrolysis systems are

consistent with the 2020 H<sub>2</sub>A production model for a future central PEM electrolysis system.<sup>17</sup> Similarly, the lower interest rates and higher lifetimes of DACC and RWGS are consistent with literature assumptions.<sup>1,9</sup> For all processes, the plant utilization rate is assumed to be 90%, meaning that the plants operate 328.5 days at 24 hrs/day in a year.

### S.2.2. Operational costs

The considered fixed operational costs ( $OPEX_{fixed}$ ) here consist of operating labor, supervision, direct salary overhead, maintenance, property taxes and insurance, rent of land, general plant overhead, and environmental charges, consistent with the method used by Towler and Sinnott.<sup>16</sup> Table S.7 reports the assumptions made for estimating each component of the  $OPEX_{fixed}$ . The variable OPEX ( $OPEX_{var}$ ) consists of raw materials, utilities, and any consumable (e.g., catalysts). Table S.8 summarizes the prices used for estimating these cost components. The costs of natural gas and renewable electricity are assumed to be constant at \$5.03/GJ and \$45/MWh, respectively. It is worth noting, however, that the \$45/MWh represents a rough average for solar photovoltaic (PV) electricity. Finally, the total  $OPEX_{annual}$  is the sum of  $OPEX_{fixed}$  and  $OPEX_{var}$ , Eq. S.28.

$$(S.28) \quad OPEX_{annual} = OPEX_{fixed} + OPEX_{var}$$

**Table S.7.** Assumptions of each operational cost component.

| Component                       | Percentage | of                              |
|---------------------------------|------------|---------------------------------|
| Supervision                     | 25%        | Operating labor                 |
| Direct salary overhead          | 50%        | (Operating labor + Supervision) |
| Maintenance                     | 3%         | ISBL                            |
| Property taxes & insurance      | 1%         | ISBL                            |
| Rent of land                    | 1%         | (ISBL + OSBL)                   |
| General plant overhead          | 50%        | (labor + maintenance)           |
| Allocated environmental charges | 1%         | (ISBL + OSBL)                   |

**Table S.8.** Prices of components used in the techno-economic calculations.

| Component                | Price | Source/Notes                                                                                         |
|--------------------------|-------|------------------------------------------------------------------------------------------------------|
| KOH (\$/t)               | 450   | Price of caustic potash in the U.S. in December of 2020 based on data from ChemAnalyst <sup>23</sup> |
| CaCO <sub>3</sub> (\$/t) | 7     | <i>Back calculated from discussion in Keith et al.<sup>1</sup></i>                                   |
| H <sub>2</sub> O (\$/t)  | 0.1   | Keith et al. <sup>1</sup>                                                                            |
| HCl (\$/t)               | 84.77 | Average 1-yr price in 2017-2018 based on data from Intratec <sup>24</sup>                            |
| Electricity (\$/MWh)     | 45    | <i>Rough average considering \$30/MWh and \$60/MWh are the minimum and maximum possible prices</i>   |
| Natural gas (\$/GJ)      | 4.52  | (2050 price) in the 2023 U.S. EIA annual energy outlook report <sup>25</sup>                         |

### S.3. Mass flow rates and fractions of major DACC equipment

Tables S.9 – S.12 summarize the stream total mass flow rates and the component mass fractions of major equipment (i.e., air contactor, pellet reactor, calciner, and slaker) from our 1 Mt-CO<sub>2</sub>/yr model. Similar calculations were performed for the scaled up versions that were integrated with CO<sub>2</sub> electrolysis and RWGS, which are shown in Tables S.13 – S.16 and Tables S.17 – S.20, respectively.

**1 Mt-CO<sub>2</sub> DACC plant:**

**Table S.9.** Mass flow rate and fraction information of the modeled air contactor units for the 1 Mt-CO<sub>2</sub>/yr plant.

|                                | Inlet Air | Inlet Solvent | Outlet Air | Outlet Solvent |
|--------------------------------|-----------|---------------|------------|----------------|
| $\dot{m}_{tot}$ [t/hr]         | 251,000.0 | 5,468.9       | 251,360.8  | 5,108.1        |
| CO <sub>2</sub>                | 0.000600  |               | 0.000160   | 0.000001       |
| H <sub>2</sub> O               | 0.009800  | 0.884299      | 0.011661   | 0.844938       |
| K <sup>+</sup>                 |           | 0.071632      |            | 0.076691       |
| CO <sub>3</sub> <sup>2-</sup>  |           | 0.029788      |            |                |
| O <sub>2</sub>                 | 0.230000  | 0.000001      | 0.229670   | 0.000004       |
| N <sub>2</sub>                 | 0.759600  | 0.000002      | 0.758510   | 0.000007       |
| HCO <sub>3</sub> <sup>-</sup>  |           | 0.000004      |            | 0.062385       |
| H <sub>3</sub> O <sup>+</sup>  |           |               |            |                |
| OH <sup>-</sup>                |           | 0.014274      |            | 0.015972       |
| KOH                            |           |               |            |                |
| K <sub>2</sub> CO <sub>3</sub> |           |               |            |                |
| KHCO <sub>3</sub>              |           |               |            |                |
| Ca <sup>2+</sup>               |           |               |            |                |
| Ca(OH) <sub>2</sub>            |           |               |            |                |
| CaCO <sub>3</sub>              |           |               |            |                |
| CaO                            |           |               |            |                |
| CH <sub>4</sub>                |           |               |            |                |
| C <sub>2</sub> H <sub>6</sub>  |           |               |            |                |
| CaOH <sup>+</sup>              |           |               |            |                |

**Table S.10.** Mass flow rate and fraction information of the modeled pellet reactors for the 1 Mt-CO<sub>2</sub>/yr plant.

|                                | Cap. Sol. | CaCO <sub>3</sub><br>(cal.) | CaCO <sub>3</sub><br>(rec.) | CaCO <sub>3</sub><br>(mkup) | Ca(OH) <sub>2</sub> | Liq. Rec. | CaCO <sub>3</sub><br>out | Liq. Out  |
|--------------------------------|-----------|-----------------------------|-----------------------------|-----------------------------|---------------------|-----------|--------------------------|-----------|
| $\dot{m}_{tot}$<br>[t/hr]      | 34,787.9  | 6.0                         | 4.7                         | 3.6                         | 802.0               | 170,512.8 | 277.6                    | 205,377.7 |
| CO <sub>2</sub>                |           |                             |                             |                             |                     |           |                          |           |
| H <sub>2</sub> O               | 0.8842    |                             |                             |                             | 0.7220              | 0.8804    |                          | 0.8877    |
| K <sup>+</sup>                 | 0.0715    |                             |                             |                             | 0.0038              | 0.0706    |                          | 0.0706    |
| CO <sub>3</sub> <sup>2-</sup>  | 0.0303    |                             |                             |                             |                     |           |                          | 0.0249    |
| O <sub>2</sub>                 |           |                             |                             |                             |                     |           |                          |           |
| N <sub>2</sub>                 |           |                             |                             |                             |                     |           |                          |           |
| HCO <sub>3</sub> <sup>-</sup>  |           |                             |                             |                             | 0.0013              | 0.0254    |                          |           |
| H <sub>3</sub> O <sup>+</sup>  |           |                             |                             |                             |                     |           |                          |           |
| OH <sup>-</sup>                | 0.0139    |                             |                             |                             | 0.1260              | 0.0236    |                          | 0.0166    |
| KOH                            |           |                             |                             |                             |                     |           |                          |           |
| K <sub>2</sub> CO <sub>3</sub> | 0.8842    |                             |                             |                             |                     |           |                          |           |
| KHCO <sub>3</sub>              | 0.0716    |                             |                             |                             |                     |           |                          |           |
| Ca <sup>2+</sup>               | 0.0303    |                             |                             |                             | 0.1469              |           |                          |           |
| Ca(OH) <sub>2</sub>            |           |                             |                             |                             |                     |           |                          |           |
| CaCO <sub>3</sub>              |           | 1.0000                      | 1.0000                      | 1.0000                      |                     |           | 1.000                    | 0.0002    |
| CaO                            |           |                             |                             |                             |                     |           |                          |           |
| CH <sub>4</sub>                |           |                             |                             |                             |                     |           |                          |           |
| C <sub>2</sub> H <sub>6</sub>  | 0.01393   |                             |                             |                             |                     |           |                          |           |
| CaOH <sup>+</sup>              |           |                             |                             |                             |                     |           |                          |           |



**Table S.11.** Mass flow rate and fraction information of the modeled calciners for the 1 Mt-CO<sub>2</sub>/yr plant.

|                                | CaCO <sub>3</sub> in | CaCO <sub>3</sub> fines | CH <sub>4</sub> | O <sub>2</sub> /N <sub>2</sub> | Solids out | Gases out |
|--------------------------------|----------------------|-------------------------|-----------------|--------------------------------|------------|-----------|
| $\dot{m}_{tot}$ [t/hr]         | 227.6                | 22.6                    | 12.8            | 55.4                           | 170.8      | 197.5     |
| CO <sub>2</sub>                |                      |                         |                 |                                |            | 0.832039  |
| H <sub>2</sub> O               |                      |                         |                 |                                |            | 0.144985  |
| K <sup>+</sup>                 |                      |                         |                 |                                |            |           |
| CO <sub>3</sub> <sup>2-</sup>  |                      |                         |                 |                                |            |           |
| O <sub>2</sub>                 |                      |                         |                 | 0.956000                       |            | 0.010634  |
| N <sub>2</sub>                 |                      |                         |                 | 0.044000                       |            | 0.012342  |
| HCO <sub>3</sub> <sup>-</sup>  |                      |                         |                 |                                |            |           |
| H <sub>3</sub> O <sup>+</sup>  |                      |                         |                 |                                |            |           |
| OH <sup>-</sup>                |                      |                         |                 |                                |            |           |
| KOH                            |                      |                         |                 |                                |            |           |
| K <sub>2</sub> CO <sub>3</sub> |                      |                         |                 |                                |            |           |
| KHCO <sub>3</sub>              |                      |                         |                 |                                |            |           |
| Ca <sup>2+</sup>               |                      |                         |                 |                                |            |           |
| Ca(OH) <sub>2</sub>            |                      |                         |                 |                                |            |           |
| CaCO <sub>3</sub>              | 1.000000             | 1.000000                |                 |                                | 0.035144   |           |
| CaO                            |                      |                         |                 |                                | 0.964856   |           |
| CH <sub>4</sub>                |                      |                         | 1.000000        |                                |            |           |
| C <sub>2</sub> H <sub>6</sub>  |                      |                         |                 |                                |            |           |
| CaOH <sup>+</sup>              |                      |                         |                 |                                |            |           |

**Table S.12.** Mass flow rate and fraction information of the modeled slakers for the 1 Mt-CO<sub>2</sub>/yr plant.

|                                | CaO in   | H <sub>2</sub> O | H <sub>2</sub> O wash | Recycled Ca(OH) <sub>2</sub> |
|--------------------------------|----------|------------------|-----------------------|------------------------------|
| $\dot{m}_{tot}$ [t/hr]         | 164.8    | 70.2             | 567.0                 | 802.0                        |
| CO <sub>2</sub>                |          |                  | 0.000001              |                              |
| H <sub>2</sub> O               |          | 0.999994         | 0.990877              | 0.722017                     |
| K <sup>+</sup>                 |          |                  | 0.005443              | 0.003848                     |
| CO <sub>3</sub> <sup>2-</sup>  |          |                  |                       |                              |
| O <sub>2</sub>                 |          |                  |                       |                              |
| N <sub>2</sub>                 |          |                  |                       |                              |
| HCO <sub>3</sub> <sup>-</sup>  |          |                  | 0.001819              | 0.001287                     |
| H <sub>3</sub> O <sup>+</sup>  |          | 0.000003         |                       |                              |
| OH <sup>-</sup>                |          | 0.000003         | 0.001861              | 0.125975                     |
| KOH                            |          |                  |                       |                              |
| K <sub>2</sub> CO <sub>3</sub> |          |                  |                       |                              |
| KHCO <sub>3</sub>              |          |                  |                       |                              |
| Ca <sup>2+</sup>               |          |                  |                       | 0.146873                     |
| Ca(OH) <sub>2</sub>            |          |                  |                       |                              |
| CaCO <sub>3</sub>              |          |                  |                       |                              |
| CaO                            | 1.000000 |                  |                       |                              |
| CH <sub>4</sub>                |          |                  |                       |                              |
| C <sub>2</sub> H <sub>6</sub>  |          |                  |                       |                              |
| CaOH <sup>+</sup>              |          |                  |                       |                              |

**DACC-RWGS plant:**

**Table S.13.** Mass flow rate and fraction information of the modeled air contactor units for the DACC plant that was integrated with RWGS.

|                                | Inlet Air | Inlet Solvent | Outlet Air | Outlet Solvent |
|--------------------------------|-----------|---------------|------------|----------------|
| $\dot{m}_{tot}$ [t/hr]         | 525,531.3 | 16,788.4      | 526,296.7  | 16,023.0       |
| CO <sub>2</sub>                | 0.000600  |               | 0.000139   | 0.000001       |
| H <sub>2</sub> O               | 0.009800  | 0.883743      | 0.011701   | 0.854033       |
| K <sup>+</sup>                 |           | 0.072352      |            | 0.075808       |
| CO <sub>3</sub> <sup>2-</sup>  |           | 0.028687      |            |                |
| O <sub>2</sub>                 | 0.230000  | 0.000001      | 0.229665   | 0.000004       |
| N <sub>2</sub>                 | 0.759600  | 0.000002      | 0.758495   | 0.000007       |
| HCO <sub>3</sub> <sup>-</sup>  |           | 0.000004      |            | 0.051534       |
| H <sub>3</sub> O <sup>+</sup>  |           |               |            | 0.000000       |
| OH <sup>-</sup>                |           | 0.015212      |            | 0.018613       |
| KOH                            |           |               |            |                |
| K <sub>2</sub> CO <sub>3</sub> |           |               |            |                |
| KHCO <sub>3</sub>              |           |               |            |                |
| Ca <sup>2+</sup>               |           |               |            |                |
| Ca(OH) <sub>2</sub>            |           |               |            |                |
| CaCO <sub>3</sub>              |           |               |            |                |
| CaO                            |           |               |            |                |
| CH <sub>4</sub>                |           |               |            |                |
| C <sub>2</sub> H <sub>6</sub>  |           |               |            |                |
| CaOH <sup>+</sup>              |           |               |            |                |

**Table S.14.** Mass flow rate and fraction information of the modeled pellet reactors for the DACC plant that was integrated with RWGS.

|                                | Cap. Sol. | CaCO <sub>3</sub><br>(cal.) | CaCO <sub>3</sub><br>(rec.) | CaCO <sub>3</sub><br>(mkup) | Ca(OH) <sub>2</sub> | Liq. Rec. | CaCO <sub>3</sub><br>out | Liq. Out  |
|--------------------------------|-----------|-----------------------------|-----------------------------|-----------------------------|---------------------|-----------|--------------------------|-----------|
| $\dot{m}_{tot}$<br>[t/hr]      | 103,667.5 | 12.6                        | 9.9                         | 7.4                         | 610.8               | 469,110.9 | 581.3                    | 572,837.7 |
| CO <sub>2</sub>                |           |                             |                             |                             |                     |           |                          |           |
| H <sub>2</sub> O               | 0.8837    |                             |                             |                             | 0.2517              | 0.8775    |                          | 0.8851    |
| K <sup>+</sup>                 | 0.0722    |                             |                             |                             | 0.0011              | 0.0723    |                          | 0.0723    |
| CO <sub>3</sub> <sup>2-</sup>  | 0.0291    |                             |                             |                             |                     |           |                          | 0.0256    |
| O <sub>2</sub>                 |           |                             |                             |                             |                     |           |                          |           |
| N <sub>2</sub>                 |           |                             |                             |                             |                     |           |                          |           |
| HCO <sub>3</sub> <sup>-</sup>  |           |                             |                             |                             | 0.0004              | 0.0260    |                          |           |
| H <sub>3</sub> O <sup>+</sup>  |           |                             |                             |                             |                     | 0.0000    |                          |           |
| OH <sup>-</sup>                | 0.0149    |                             |                             |                             | 0.3431              | 0.0242    |                          | 0.0169    |
| KOH                            |           |                             |                             |                             |                     |           |                          |           |
| K <sub>2</sub> CO <sub>3</sub> |           |                             |                             |                             |                     |           |                          |           |
| KHCO <sub>3</sub>              |           |                             |                             |                             |                     |           |                          |           |
| Ca <sup>2+</sup>               |           |                             |                             |                             | 0.4038              |           |                          |           |
| Ca(OH) <sub>2</sub>            |           |                             |                             |                             |                     |           |                          |           |
| CaCO <sub>3</sub>              |           | 1.0000                      | 1.0000                      | 1.0000                      |                     |           | 1.0000                   | 0.0001    |
| CaO                            |           |                             |                             |                             |                     |           |                          |           |
| CH <sub>4</sub>                |           |                             |                             |                             |                     |           |                          |           |
| C <sub>2</sub> H <sub>6</sub>  |           |                             |                             |                             |                     |           |                          |           |
| CaOH <sup>+</sup>              |           |                             |                             |                             |                     |           |                          |           |

**Table S.15.** Mass flow rate and fraction information of the modeled calciners for the DACC plant that was integrated with RWGS.

|                                | CaCO <sub>3</sub> in | CaCO <sub>3</sub> fines | CH <sub>4</sub> | O <sub>2</sub> /N <sub>2</sub> | Solids out | Gases out |
|--------------------------------|----------------------|-------------------------|-----------------|--------------------------------|------------|-----------|
| $\dot{m}_{tot}$ [t/hr]         | 581.3                | 47.2                    | 26.7            | 116.1                          | 357.7      | 413.6     |
| CO <sub>2</sub>                |                      |                         |                 |                                |            | 0.8317    |
| H <sub>2</sub> O               |                      |                         |                 |                                |            | 0.1448    |
| K <sup>+</sup>                 |                      |                         |                 |                                |            |           |
| CO <sub>3</sub> <sup>2-</sup>  |                      |                         |                 |                                |            |           |
| O <sub>2</sub>                 |                      |                         |                 | 0.9560                         |            | 0.0111    |
| N <sub>2</sub>                 |                      |                         |                 | 0.0440                         |            | 0.0123    |
| HCO <sub>3</sub> <sup>-</sup>  |                      |                         |                 |                                |            |           |
| H <sub>3</sub> O <sup>+</sup>  |                      |                         |                 |                                |            |           |
| OH <sup>-</sup>                |                      |                         |                 |                                |            |           |
| KOH                            |                      |                         |                 |                                |            |           |
| K <sub>2</sub> CO <sub>3</sub> |                      |                         |                 |                                |            |           |
| KHCO <sub>3</sub>              |                      |                         |                 |                                |            |           |
| Ca <sup>2+</sup>               |                      |                         |                 |                                |            |           |
| Ca(OH) <sub>2</sub>            |                      |                         |                 |                                |            |           |
| CaCO <sub>3</sub>              | 1.0000               | 1.0000                  |                 |                                | 0.0351     |           |
| CaO                            |                      |                         |                 |                                | 0.9649     |           |
| CH <sub>4</sub>                |                      |                         | 1.0000          |                                |            |           |
| C <sub>2</sub> H <sub>6</sub>  |                      |                         |                 |                                |            |           |
| CaOH <sup>+</sup>              |                      |                         |                 |                                |            |           |

**Table S.16.** Mass flow rate and fraction information of the modeled slakers for the DACC plant that was integrated with RWGS.

|                                | CaO in | H <sub>2</sub> O | H <sub>2</sub> O wash | Recycled Ca(OH) <sub>2</sub> |
|--------------------------------|--------|------------------|-----------------------|------------------------------|
| $\dot{m}_{tot}$ [t/hr]         | 345.1  | 147.0            | 118.7                 | 610.8                        |
| CO <sub>2</sub>                |        |                  |                       |                              |
| H <sub>2</sub> O               |        | 1.0000           | 0.9909                | 0.2517                       |
| K <sup>+</sup>                 |        |                  | 0.0054                | 0.0011                       |
| CO <sub>3</sub> <sup>2-</sup>  |        |                  |                       |                              |
| O <sub>2</sub>                 |        |                  |                       |                              |
| N <sub>2</sub>                 |        |                  |                       |                              |
| HCO <sub>3</sub> <sup>-</sup>  |        |                  | 0.0018                | 0.0004                       |
| H <sub>3</sub> O <sup>+</sup>  |        |                  |                       |                              |
| OH <sup>-</sup>                |        |                  | 0.0019                | 0.3431                       |
| KOH                            |        |                  |                       |                              |
| K <sub>2</sub> CO <sub>3</sub> |        |                  |                       |                              |
| KHCO <sub>3</sub>              |        |                  |                       |                              |
| Ca <sup>2+</sup>               |        |                  |                       | 0.4038                       |
| Ca(OH) <sub>2</sub>            |        |                  |                       |                              |
| CaCO <sub>3</sub>              |        |                  |                       |                              |
| CaO                            | 1.0000 |                  |                       |                              |
| CH <sub>4</sub>                |        |                  |                       |                              |
| C <sub>2</sub> H <sub>6</sub>  |        |                  |                       |                              |
| CaOH <sup>+</sup>              |        |                  |                       |                              |

**DACC-CO<sub>2</sub>ER plant:****Table S.17.** Mass flow rate and fraction information of the modeled air contactor units for the DACC plant that was integrated with CO<sub>2</sub> electrolysis.

|                                | Inlet Air | Inlet Solvent | Outlet Air | Outlet Solvent |
|--------------------------------|-----------|---------------|------------|----------------|
| $\dot{m}_{tot}$ [t/hr]         | 502,784.4 | 15,780.5      | 15,001.7   | 503,563.1      |
| CO <sub>2</sub>                | 0.000600  |               | 0.000139   | 0.000001       |
| H <sub>2</sub> O               | 0.009800  | 0.884986      | 0.011792   | 0.854660       |
| K <sup>+</sup>                 |           | 0.071633      |            | 0.075352       |
| CO <sub>3</sub> <sup>2-</sup>  |           | 0.028199      |            |                |
| O <sub>2</sub>                 | 0.230000  | 0.000001      | 0.229644   | 0.000004       |
| N <sub>2</sub>                 | 0.759600  | 0.000001      | 0.758425   | 0.000007       |
| HCO <sub>3</sub> <sup>-</sup>  |           | 0.000004      |            | 0.051571       |
| H <sub>3</sub> O <sup>+</sup>  |           |               |            |                |
| OH <sup>-</sup>                |           | 0.015176      |            | 0.018404       |
| KOH                            |           |               |            |                |
| K <sub>2</sub> CO <sub>3</sub> |           |               |            |                |
| KHCO <sub>3</sub>              |           |               |            |                |
| Ca <sup>2+</sup>               |           |               |            |                |
| Ca(OH) <sub>2</sub>            |           |               |            |                |
| CaCO <sub>3</sub>              |           |               |            |                |
| CaO                            |           |               |            |                |
| CH <sub>4</sub>                |           |               |            |                |
| C <sub>2</sub> H <sub>6</sub>  |           |               |            |                |
| CaOH <sup>+</sup>              |           |               |            |                |

**Table S.18.** Mass flow rate and fraction information of the modeled pellet reactors for the DACC plant that was integrated with CO<sub>2</sub> electrolysis.

|                                | Cap. Sol. | CaCO <sub>3</sub><br>(cal.) | CaCO <sub>3</sub><br>(rec.) | CaCO <sub>3</sub><br>(mkup) | Ca(OH) <sub>2</sub> | Liq. Rec. | CaCO <sub>3</sub><br>out | Liq. Out  |
|--------------------------------|-----------|-----------------------------|-----------------------------|-----------------------------|---------------------|-----------|--------------------------|-----------|
| $\dot{m}_{tot}$<br>[t/hr]      | 97,557.2  | 12.0                        | 9.5                         | 7.1                         | 1,606.6             | 446,086.4 | 556.1                    | 544,722.5 |
| CO <sub>2</sub>                |           |                             |                             |                             |                     |           |                          |           |
| H <sub>2</sub> O               | 0.8849    |                             |                             |                             | 0.7220              | 0.8800    |                          | 0.8874    |
| K <sup>+</sup>                 | 0.0716    |                             |                             |                             | 0.0038              | 0.0709    |                          | 0.0709    |
| CO <sub>3</sub> <sup>2-</sup>  | 0.0287    |                             |                             |                             |                     |           |                          | 0.0248    |
| O <sub>2</sub>                 |           |                             |                             |                             |                     |           |                          |           |
| N <sub>2</sub>                 |           |                             |                             |                             |                     |           |                          |           |
| HCO <sub>3</sub> <sup>-</sup>  |           |                             |                             |                             | 0.0013              | 0.0253    |                          |           |
| H <sub>3</sub> O <sup>+</sup>  |           |                             |                             |                             | 0.0000              | 0.0000    |                          |           |
| OH <sup>-</sup>                | 0.0149    |                             |                             |                             | 0.1260              | 0.0238    |                          | 0.0168    |
| KOH                            |           |                             |                             |                             |                     |           |                          |           |
| K <sub>2</sub> CO <sub>3</sub> |           |                             |                             |                             |                     |           |                          |           |
| KHCO <sub>3</sub>              |           |                             |                             |                             |                     |           |                          |           |
| Ca <sup>2+</sup>               |           |                             |                             |                             | 0.1469              |           |                          |           |
| Ca(OH) <sub>2</sub>            |           |                             |                             |                             |                     |           |                          |           |
| CaCO <sub>3</sub>              |           | 1.0000                      | 1.0000                      | 1.0000                      |                     |           | 1.0000                   | 0.0001    |
| CaO                            |           |                             |                             |                             |                     |           |                          |           |
| CH <sub>4</sub>                |           |                             |                             |                             |                     |           |                          |           |
| C <sub>2</sub> H <sub>6</sub>  |           |                             |                             |                             |                     |           |                          |           |
| CaOH <sup>+</sup>              |           |                             |                             |                             |                     |           |                          |           |



**Table S.19.** Mass flow rate and fraction information of the modeled calciners for the DACC plant that was integrated with CO<sub>2</sub> electrolysis.

|                                | CaCO <sub>3</sub> in | CaCO <sub>3</sub> fines | CH <sub>4</sub> | O <sub>2</sub> /N <sub>2</sub> | Solids out | Gases out |
|--------------------------------|----------------------|-------------------------|-----------------|--------------------------------|------------|-----------|
| $\dot{m}_{tot}$ [t/hr]         | 556.1                | 45.2                    | 25.5            | 111.3                          | 342.2      | 396.0     |
| CO <sub>2</sub>                |                      |                         |                 |                                |            | 0.8314    |
| H <sub>2</sub> O               |                      |                         |                 |                                |            | 0.1449    |
| K <sup>+</sup>                 |                      |                         |                 |                                |            |           |
| CO <sub>3</sub> <sup>2-</sup>  |                      |                         |                 |                                |            |           |
| O <sub>2</sub>                 |                      |                         |                 | 0.9560                         |            | 0.0114    |
| N <sub>2</sub>                 |                      |                         |                 | 0.0440                         |            | 0.0124    |
| HCO <sub>3</sub> <sup>-</sup>  |                      |                         |                 |                                |            |           |
| H <sub>3</sub> O <sup>+</sup>  |                      |                         |                 |                                |            |           |
| OH <sup>-</sup>                |                      |                         |                 |                                |            |           |
| KOH                            |                      |                         |                 |                                |            |           |
| K <sub>2</sub> CO <sub>3</sub> |                      |                         |                 |                                |            |           |
| KHCO <sub>3</sub>              |                      |                         |                 |                                |            |           |
| Ca <sup>2+</sup>               |                      |                         |                 |                                |            |           |
| Ca(OH) <sub>2</sub>            |                      |                         |                 |                                |            |           |
| CaCO <sub>3</sub>              | 1.0000               | 1.0000                  |                 |                                | 0.0351     |           |
| CaO                            |                      |                         |                 |                                | 0.9649     |           |
| CH <sub>4</sub>                |                      |                         | 1.0000          |                                |            |           |
| C <sub>2</sub> H <sub>6</sub>  |                      |                         |                 |                                |            |           |
| CaOH <sup>+</sup>              |                      |                         |                 |                                |            |           |

**Table S.20.** Mass flow rate and fraction information of the modeled slakers for the DACC plant that was integrated with CO<sub>2</sub> electrolysis.

|                                | CaO in | H <sub>2</sub> O | H <sub>2</sub> O wash | Recycled Ca(OH) <sub>2</sub> |
|--------------------------------|--------|------------------|-----------------------|------------------------------|
| $\dot{m}_{tot}$ [t/hr]         | 330.2  | 140.6            | 1,135.8               | 1,606.6                      |
| CO <sub>2</sub>                |        |                  |                       |                              |
| H <sub>2</sub> O               |        | 1.0000           | 0.9909                | 0.7220                       |
| K <sup>+</sup>                 |        |                  | 0.0054                | 0.0038                       |
| CO <sub>3</sub> <sup>2-</sup>  |        |                  |                       |                              |
| O <sub>2</sub>                 |        |                  |                       |                              |
| N <sub>2</sub>                 |        |                  |                       |                              |
| HCO <sub>3</sub> <sup>-</sup>  |        |                  | 0.0018                | 0.0013                       |
| H <sub>3</sub> O <sup>+</sup>  |        |                  |                       | 0.0000                       |
| OH <sup>-</sup>                |        |                  | 0.0019                | 0.1260                       |
| KOH                            |        |                  |                       |                              |
| K <sub>2</sub> CO <sub>3</sub> |        |                  |                       |                              |
| KHCO <sub>3</sub>              |        |                  |                       |                              |
| Ca <sup>2+</sup>               |        |                  |                       | 0.1469                       |
| Ca(OH) <sub>2</sub>            |        |                  |                       |                              |
| CaCO <sub>3</sub>              |        |                  |                       |                              |
| CaO                            | 1.0000 |                  |                       |                              |
| CH <sub>4</sub>                |        |                  |                       |                              |
| C <sub>2</sub> H <sub>6</sub>  |        |                  |                       |                              |
| CaOH <sup>+</sup>              |        |                  |                       |                              |

## S.4. Technical metrics calculations

### S.4.1. Carbon efficiency

Carbon efficiency is defined as the moles of carbon in the desired product over the moles of carbon in the reactants. In the present work, we used Eq. S.29 to calculate this metric.

$$(S.29) \quad CE = \frac{n_{C,CO}}{n_{C,CO_2/CH_4}}$$

### S.4.2. Energy consumption

The energy consumption of DACC was calculated using Aspen Energy Analyzer after implementing heat integration. As found in the text, these values were found to be 577.7 and 550.3 MW<sub>th</sub>. For CO<sub>2</sub> electrolysis, we used Eq. S.30, where  $V_{cell}$ ,  $n_{e^-}$ ,  $F$ ,  $FE_{CO}$ , and  $MW_{CO}$  are the cell voltage, number of required electrons, Faraday's constant, Faradaic efficiency of CO, and molecular weight of CO, respectively.

$$(S.30) \quad E_{CO_2ER} \left( \frac{MWh}{t-CO} \right) = \frac{V_{cell} \cdot n_{e^-} \cdot F}{FE_{CO} \cdot MW_{CO}} \cdot \frac{3600 \cdot 10^6}{10^6}$$

For water electrolysis, we use 4.3 kWh/Nm<sup>3</sup>-H<sub>2</sub> as the electricity consumption. To get the electricity consumption in MWh/t-CO, we use Eq. S.31, where  $E_{PEMWE}^o$ ,  $MW_{H_2}$ , and  $Z_{H_2/syngas}$  are the electricity consumption of PEMWE in kWh/Nm<sup>3</sup>-H<sub>2</sub>, molecular weight of H<sub>2</sub>, and mass ratio of H<sub>2</sub> to syngas, respectively.

$$(S.31) \quad E_{PEMWE} \left( \frac{MWh}{t-CO} \right) = E_{PEMWE}^o \left( \frac{8.314 \cdot 273.15}{101325} \right) \cdot (1000) \cdot Z_{H_2/syngas}$$

For RWGS and SMR, we reference Rezaei and Dzuryk's study results.<sup>9</sup>

## S.5. Supplementary figures

### S.5.1. Comparison of our and Keith et al.'s modeling results

Fig. S.1. shows the mass flow differences of our and Keith et al.'s modeling results for the major components in the air contactor and calciner. Note the minimal difference of mass flow rate of all components except for O<sub>2</sub>, which is explained by the fact that we used lower amounts

of methane in the calciner to achieve a net zero heat duty. The figure highlights the consistency between our and Keith et al.'s<sup>1</sup> results.

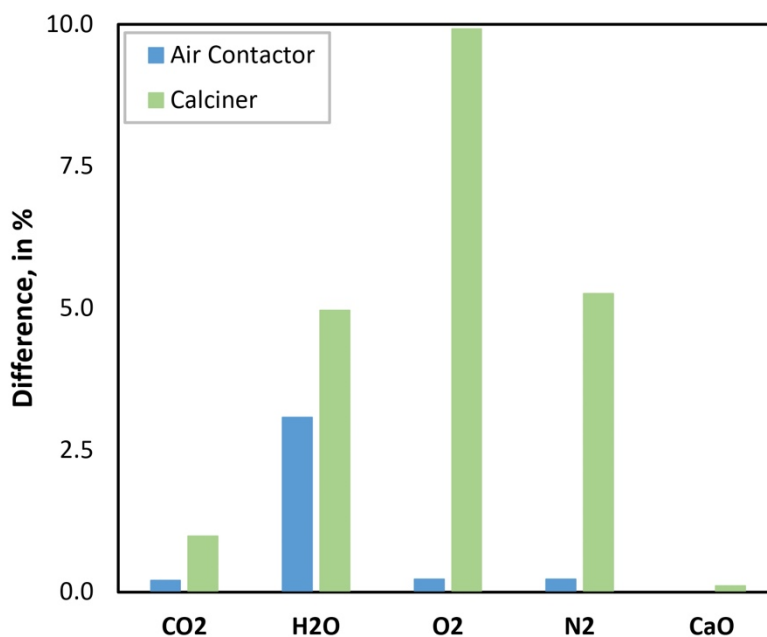

**Figure S.1.** Mass flow rate difference between our and Keith et al.'s modeling results. Blue bars (left): Air contactor; Green bars (right): Calciner.

### S.5.2. Additional future scenarios

Fig. S.2. shows the same data in Fig. 7 of the main text with the addition of a case in which the CO<sub>2</sub> tax and tax credit are \$0/t-CO<sub>2</sub>. We discuss the results further in the main text, but in short, the electricity price targets that would allow DAC-PEMWE-CO<sub>2</sub>ER to begin competing economically with conventional syngas production methods are ≤\$18/MWh, ≤\$19/MWh, ≤\$21/MWh, ≤\$23/MWh for the 2.50, 2.25, 2.00, and 1.75 V cases, respectively.

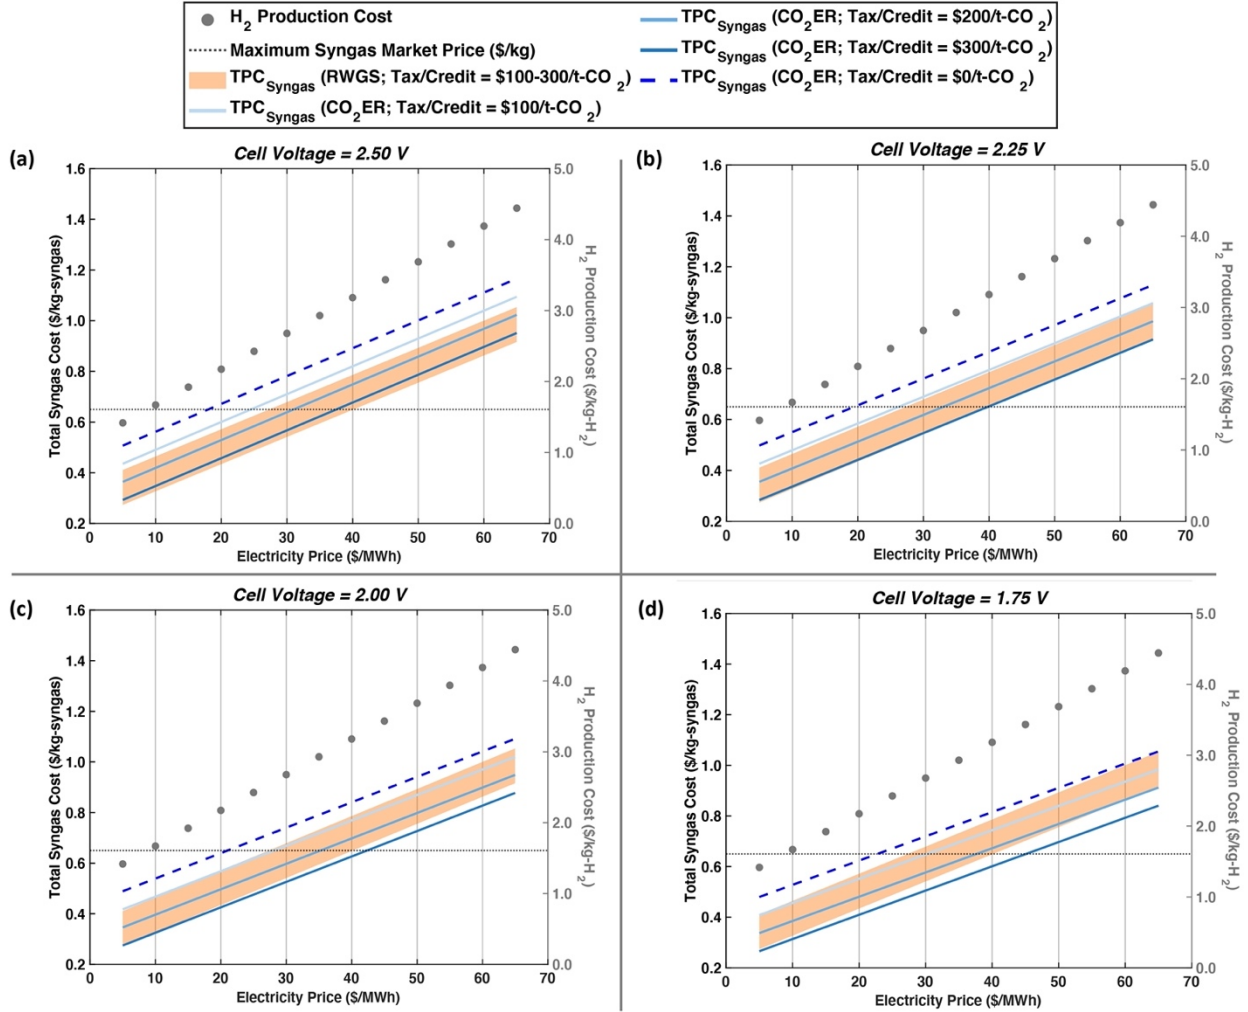

**Figure S.2.** Future scenarios of DACC-PEMWE-RWGS (shaded orange) and DACC-PEMWE- $CO_2$ ER (blue solid and dashed lines) routes, showing the maximum syngas price via conventional methods (dotted black line) and the  $H_2$  production cost (grey dots). Note the different shades in the blue solid lines represent different  $CO_2$  tax and tax credits. The blue dashed line is showing the additional case of \$0/t- $CO_2$  tax and tax credit.

Fig. S.3. shows the same data in Fig. 7 of the main text with the addition of a case in which the  $CO_2$  tax and tax credit are \$130/t- $CO_2$ . This value is what is given in section 45Q of the U.S. internal revenue code for  $CO_2$  captured by DACC and used to make fuels or chemicals. Similar to Fig. S.2., we provide further discussion of the results in the main text. The main takeaway, however, is that the electricity price targets that would allow DACC-PEMWE- $CO_2$ ER to begin competing economically with conventional syngas production methods are  $\leq$ \$26/MWh,  $\leq$ \$28/MWh,  $\leq$ \$30/MWh, and  $\leq$ \$32/MWh for the 2.50, 2.25, 2.00, and 1.75 V cases, respectively.

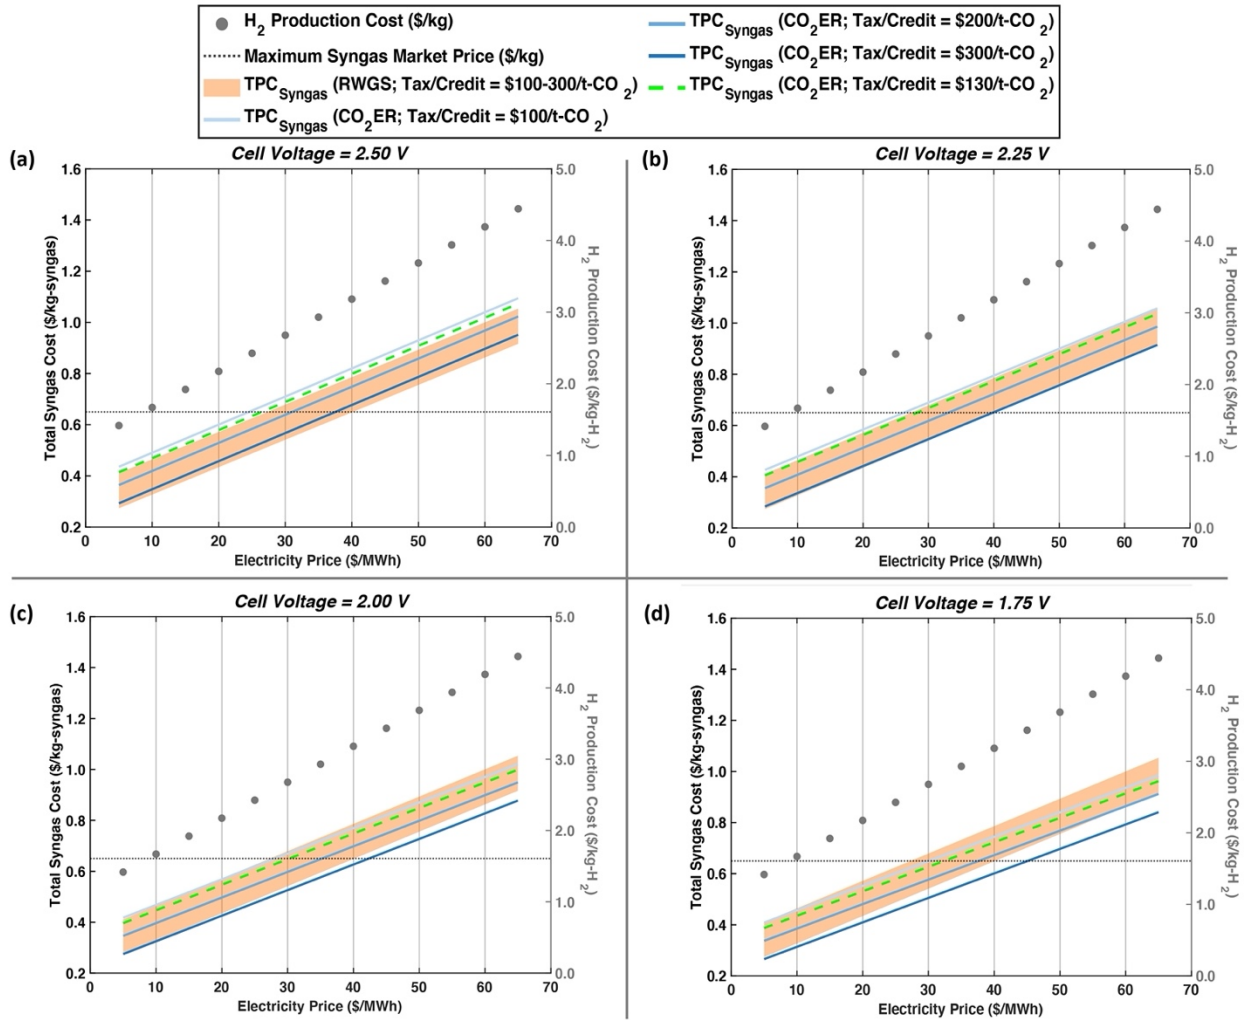

**Figure S.3.** Future scenarios of DACC-PEMWE-RWGS (shaded orange) and DACC-PEMWE-CO<sub>2</sub>ER (blue solid lines and dashed green line) routes, showing the maximum syngas price via conventional methods (dotted black line) and the H<sub>2</sub> production cost (grey dots). Note the different shades in the blue solid lines represent different CO<sub>2</sub> tax and tax credits. The green dashed line is showing the additional case of \$130/t-CO<sub>2</sub> tax and tax credit.

### S.5.3. Aspen Plus process flow diagram of the DACC plant

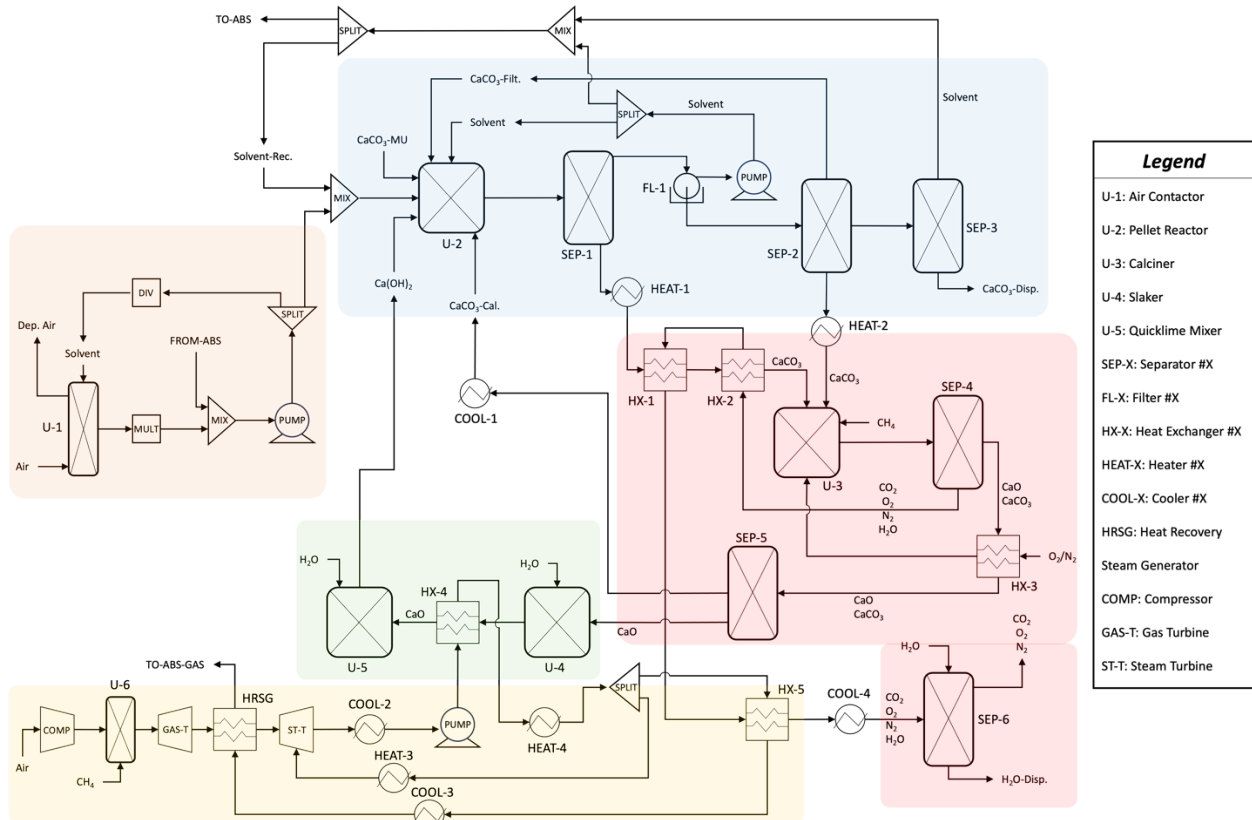

**Figure S.4.** Process flow diagram of the DACC plant that was built in Aspen Plus. The orange, blue, pink, green, and yellow shaded regions represent the air contactor, pellet reactor, calciner, slaker, and power island sections, respectively. Note that we are assuming the generated CO<sub>2</sub> from the methane combustion is captured using an absorber, but we are not modeling that absorber here.

## References

1. Keith DW, Holmes G, St. Angelo D, Heidel K. A process for capturing CO<sub>2</sub> from the atmosphere. *Joule*. 2018 Aug;2(8):1573–94.
2. Holmes G, Keith DW. An air–liquid contactor for large-scale capture of CO<sub>2</sub> from air. *Phil Trans R Soc A*. 2012 Sep 13;370(1974):4380–403.
3. Heidel K, Keith D, Singh A, Holmes G. Process design and costing of an air-contactor for air-capture. *Energy Procedia*. 2011;4:2861–8.
4. Sabatino F, Grimm A, Gallucci F, van Sint Annaland M, Kramer GJ, Gazzani M. A comparative energy and costs assessment and optimization for direct air capture technologies. *Joule*. 2021 Aug;5(8):2047–76.
5. Marchese M, Buffo G, Santarelli M, Lanzini A. CO<sub>2</sub> from direct air capture as carbon feedstock for Fischer-Tropsch chemicals and fuels: Energy and economic analysis. *Journal of CO<sub>2</sub> Utilization*. 2021 Apr 1;46:101487.
6. Chen CC, Britt HI, Boston JF, Evans LB. Local composition model for excess Gibbs energy of electrolyte systems. Part I: Single solvent, single completely dissociated electrolyte systems. *AIChE Journal*. 1982;28(4):588–96.
7. Pinsent BRW, Pearson L, Roughton FJW. The kinetics of combination of carbon dioxide with hydroxide ions. *Trans Faraday Soc*. 1956 Jan 1;52(0):1512–20.
8. Edwards TJ, Maurer G, Newman J, Prausnitz JM. Vapor-liquid equilibria in multicomponent aqueous solutions of volatile weak electrolytes. *AIChE Journal*. 1978;24(6):966–76.
9. Rezaei E, Dzuryk S. Techno-economic comparison of reverse water gas shift reaction to steam and dry methane reforming reactions for syngas production. *Chemical Engineering Research and Design*. 2019 Apr 1;144:354–69.
10. Juneau M, Vonglis M, Hartvigsen J, Frost L, Bayerl D, Dixit M, et al. Assessing the viability of K-Mo<sub>2</sub>C for reverse water–gas shift scale-up: molecular to laboratory to pilot scale. *Energy Environ Sci*. 2020 Aug 13;13(8):2524–39.
11. Adelung S, Maier S, Dietrich RU. Impact of the reverse water-gas shift operating conditions on the power-to-liquid process efficiency. *Sustainable Energy Technologies and Assessments*. 2021 Feb 1;43:100897.
12. König DH, Baucks N, Dietrich RU, Wörner A. Simulation and evaluation of a process concept for the generation of synthetic fuel from CO<sub>2</sub> and H<sub>2</sub>. *Energy*. 2015 Nov 1;91:833–41.
13. Wen G, Ren B, Wang X, Luo D, Dou H, Zheng Y, et al. Continuous CO<sub>2</sub> electrolysis using a CO<sub>2</sub> exsolution-induced flow cell. *Nat Energy*. 2022 Oct;7(10):978–88.
14. Sone Y, Ekdunge P, Simonsson D. Proton conductivity of Nafion 117 as measured by a four-electrode AC impedance method. *J Electrochem Soc*. 1996 Apr 1;143(4):1254.



15. Wen G. Nanostructured materials and electrodes engineering for efficient CO<sub>2</sub> conversion [Internet]. [Waterloo, Ontario, Canada]: University of Waterloo; 2020 [cited 2023 May 19]. Available from: <http://hdl.handle.net/10012/16283>
16. Towler G, Sinnott R. Capital Cost Estimating. In: Chemical Engineering Design [Internet]. Elsevier; 2013 [cited 2023 Feb 20]. p. 307–54. Available from: <https://linkinghub.elsevier.com/retrieve/pii/B9780080966595000079>
17. NREL. H<sub>2</sub>A: Hydrogen Analysis Production Models [Internet]. 2020 [cited 2023 Feb 20]. Available from: <https://www.nrel.gov/hydrogen/h2a-production-models.html>
18. Sodiq A, Abdullatif Y, Aissa B, Ostovar A, Nassar N, El-Naas M, et al. A review on progress made in direct air capture of CO<sub>2</sub>. *Environmental Technology & Innovation*. 2023 Feb 1;29:102991.
19. Erans M, Sanz-Pérez ES, Hanak DP, Clulow Z, Reiner DM, Mutch GA. Direct air capture: process technology, techno-economic and socio-political challenges. *Energy Environ Sci*. 2022;10.1039.D1EE03523A.
20. Moreno-Gonzalez M, Berger A, Borsboom-Hanson T, Mérida W. Carbon-neutral fuels and chemicals: Economic analysis of renewable syngas pathways via CO<sub>2</sub> electrolysis. *Energy Conversion and Management*. 2021 Sep 15;244:114452.
21. Badgett A, Ruth M, Crow A, Grim G, Chen Y, Hu L, et al. An economic analysis of the role of materials, system engineering, and performance in electrochemical carbon dioxide conversion to formate. *Journal of Cleaner Production*. 2022 Jun 1;351:131564.
22. Kannangara M, Shadbahr J, Vasudev M, Yang J, Zhang L, Bensebaa F, et al. A standardized methodology for economic and carbon footprint assessment of CO<sub>2</sub> to transport fuels: Comparison of novel bicarbonate electrolysis with competing pathways. *Applied Energy*. 2022 Nov 1;325:119897.
23. ChemAnalyst. Caustic Potash Price Trend and Forecast [Internet]. 2023 [cited 2023 Jul 14]. Available from: <https://www.chemanalyst.com/Pricing-data/caustic-potash-1212>
24. INTRATEC. INTRATEC. 2018 [cited 2023 Jul 24]. Hydrochloric Acid Price. Available from: <https://www.intratec.us/chemical-markets/hydrochloric-acid-price>
25. U.S. Energy Information Administration. Annual Energy Outlook 2023 – Table 13 [Internet]. 2023 [cited 2023 Jul 13]. Available from: <https://www.eia.gov/outlooks/aeo/data/browser/#/?id=13-AEO2023&cases=ref2023&sourcekey=0>.
